# Supplementary material for: Identification of human miRNA precursors that resemble box C/D snoRNAs
Source: PubMed Central journal article supplement — Nucleic Acids Res. 2011 Jan 18;39(9):3879–91. doi: 10.1093/nar/gkq1355 (PMC3089480; doi:10.1093/nar/gkq1355), 2011-01-18

## Supplementary information

### Figure legends

#### **Supplementary Figure 1: Subcellular localization of box C/D snoRNA-like miRNA precursors**

Northern blots of HeLa cell extracts fractionated into cytoplasmic, nucleoplasmic and nucleolar fractions were probed for the presence of let-7g and mir-28 encoding molecules. In all panels, bands labeled with 'a' represent the expected size of the predicted snoRNAs, those labeled with 'b' represent the expected size for the miRNA hairpins and 'c' represents the expected size of the mature miRNA.

**Supplementary Table 1: Human micro RNAs showing features  
of Box C/D snoRNAs in their flanking regions**

| miRNA      | Number of hits* | Box C score (best hit) | Box D' score (best hit) | Box D score (best hit) | Total score of best hit | Antise nse 5S | Antise nse 18S | Antise nse 28S | Boxes in predicted miRNA hairpin from Genome Browser |
|------------|-----------------|------------------------|-------------------------|------------------------|-------------------------|---------------|----------------|----------------|------------------------------------------------------|
| mir-1201   | 233             | 6                      | 14                      | 4                      | 24                      | .             | .              | .              | CD'D                                                 |
| mir-618    | 20              | 6                      | 13                      | 4                      | 23                      | .             | .              | .              | D'D                                                  |
| mir-27b    | 20              | 5                      | 14                      | 4                      | 23                      |               | .              | .              | D'D                                                  |
| mir-500    | 32              | 5                      | 13                      | 4                      | 22                      |               | .              | .              | D'D                                                  |
| mir-1272   | 15              | 6                      | 13                      | 3                      | 22                      | .             | .              |                | CD'D                                                 |
| mir-449a   | 12              | 6                      | 13                      | 3                      | 22                      |               | .              | .              | CD'D                                                 |
| mir-765    | 7               | 6                      | 12                      | 4                      | 22                      |               | .              | .              | CD'D                                                 |
| mir-582    | 13              | 5                      | 13                      | 4                      | 22                      |               | .              | .              | CD'D                                                 |
| mir-1288   | 45              | 5                      | 13                      | 4                      | 22                      |               | .              | .              | CD'D                                                 |
| mir-1259   | 13              | 6                      | 12                      | 4                      | 22                      |               | .              | .              | CD'D                                                 |
| mir-28     | 41              | 5                      | 13                      | 4                      | 22                      |               | .              | .              | D'D                                                  |
| mir-1294   | 8               | 5                      | 13                      | 4                      | 22                      |               | .              | .              | CD'D                                                 |
| mir-504    | 5               | 5                      | 14                      | 3                      | 22                      |               | .              | .              | D'D                                                  |
| mir-621    | 10              | 5                      | 14                      | 3                      | 22                      |               | .              | .              | CD'D                                                 |
| mir-423    | 5               | 5                      | 13                      | 4                      | 22                      |               | .              | .              | CD'D                                                 |
| mir-608    | 1               | 5                      | 14                      | 3                      | 22                      |               | .              |                | D                                                    |
| mir-95     | 3               | 5                      | 12                      | 4                      | 21                      |               | .              |                | CD'                                                  |
| mir-153-2  | 2               | 5                      | 12                      | 4                      | 21                      |               | .              |                | CD'                                                  |
| mir-181b-2 | 2               | 5                      | 12                      | 4                      | 21                      |               | .              | .              | CD'D                                                 |
| mir-208a   | 3               | 5                      | 12                      | 4                      | 21                      |               | .              | .              | CD'                                                  |
| mir-340    | 3               | 5                      | 13                      | 3                      | 21                      |               |                | .              | CD'D                                                 |
| mir-491    | 2               | 5                      | 13                      | 3                      | 21                      |               |                | .              | D'D                                                  |
| mir-1200   | 10              | 5                      | 12                      | 4                      | 21                      |               | .              |                | D'D                                                  |
| mir-1205   | 9               | 5                      | 12                      | 4                      | 21                      |               | .              | .              | D'                                                   |
| mir-1256   | 4               | 5                      | 12                      | 4                      | 21                      |               | .              | .              | CD or CD'                                            |
| mir-31     | 4               | 5                      | 12                      | 4                      | 21                      |               | .              | .              | D'D                                                  |
| mir-191    | 5               | 5                      | 13                      | 3                      | 21                      |               | .              | .              | D'D                                                  |
| mir-577    | 8               | 5                      | 13                      | 3                      | 21                      |               | .              | .              | CD'D                                                 |
| mir-105-2  | 19              | 6                      | 12                      | 3                      | 21                      |               | .              | .              | D'D                                                  |
| mir-1284   | 2               | 5                      | 12                      | 4                      | 21                      |               |                | .              | CD'D                                                 |
| mir-554    | 34              | 6                      | 12                      | 3                      | 21                      |               | .              | .              | D'D                                                  |
| mir-874    | 10              | 5                      | 13                      | 3                      | 21                      |               | .              | .              | D'D                                                  |
| mir-30c-1  | 3               | 5                      | 12                      | 4                      | 21                      |               | .              | .              | D'                                                   |
| mir-29a    | 9               | 5                      | 12                      | 4                      | 21                      |               | .              | .              | D'                                                   |
| mir-553    | 6               | 5                      | 12                      | 4                      | 21                      |               | .              | .              | D'D                                                  |
| mir-151    | 4               | 5                      | 12                      | 4                      | 21                      |               |                | .              | D'D                                                  |
| mir-924    | 3               | 5                      | 12                      | 4                      | 21                      |               | .              | .              | D'D                                                  |
| mir-1266   | 7               | 5                      | 12                      | 4                      | 21                      |               | .              | .              | D'D                                                  |
| mir-592    | 4               | 6                      | 12                      | 3                      | 21                      |               |                | .              | CD'D                                                 |
| mir-486    | 10              | 5                      | 13                      | 3                      | 21                      |               | .              | .              | D                                                    |

|            |    |   |    |    |    |   |   |   |      |
|------------|----|---|----|----|----|---|---|---|------|
| mir-625    | 11 | 5 | 12 | 4  | 21 |   | . | . | CD'  |
| mir-216a   | 1  | 5 | 13 | 3  | 21 |   | . |   | D'D  |
| mir-421    | 2  | 5 | 13 | 3  | 21 |   | . |   | CD'  |
| mir-1278   | 3  | 5 | 12 | 4  | 21 | . | . | . | D'D  |
| mir-211    | 4  | 5 | 12 | 4  | 21 |   |   | . | D'D  |
| mir-1251   | 12 | 5 | 12 | 4  | 21 |   | . | . | D'D  |
| mir-567    | 3  | 6 | 12 | 3  | 21 |   | . | . | D'D  |
| mir-452    | 2  | 5 | 12 | 4  | 21 |   | . | . | D'D  |
| mir-628    | 1  | 5 | 12 | 4  | 21 |   |   | . | CD'D |
| mir-383    | 4  | 5 | 13 | 3  | 21 |   | . |   | D    |
| mir-374a   | 1  | 5 | 12 | 4  | 21 |   |   | . | D    |
| mir-1248   | 14 | 5 | 13 | 3  | 21 |   |   | . | D    |
| mir-18a    | 4  | 5 | 13 | 3  | 21 |   | . |   | D    |
| mir-101-2  | 3  | 5 | 12 | 4  | 21 |   | . | . | D'D  |
| mir-25     | 2  | 5 | 12 | 4  | 21 |   | . | . | CD'D |
| mir-591    | 2  | 6 | 12 | 3  | 21 |   | . |   | D    |
| let-7g     | 18 | 5 | 13 | 3  | 21 |   | . | . | D'D  |
| mir-653    | 2  | 5 | 12 | 4  | 21 |   |   | . | D    |
| mir-142    | 6  | 5 | 13 | 3  | 21 |   |   | . | D    |
| mir-204    | 2  | 5 | 12 | 4  | 21 | . | . |   | D'D  |
| mir-590    | 2  | 5 | 12 | 4  | 21 |   | . |   | D'D  |
| mir-218-1  | 2  | 5 | 13 | 3  | 21 |   |   | . | CD'D |
| mir-7-3    | 4  | 5 | 12 | 4  | 21 |   |   | . | D'D  |
| mir-16-1   | 3  | 5 | 12 | 4  | 21 |   |   | . | D    |
| mir-26b    | 2  | 5 | 13 | 3  | 21 |   |   | . | D    |
| mir-181a-2 | 4  | 5 | 12 | 4  | 21 |   |   | . | CD'D |
| mir-216b   | 6  | 5 | 12 | 4  | 21 |   | . | . | D'D  |
| mir-324    | 1  | 5 | 13 | 3  | 21 |   | . |   | D    |
| mir-335    | 4  | 5 | 12 | 4  | 21 | . | . | . | D    |
| mir-489    | 4  | 6 | 12 | 3  | 21 |   | . | . | D'D  |
| mir-548f-1 | 1  | 5 | 12 | 4  | 21 |   | . |   | D'D  |
| mir-548j   | 3  | 5 | 12 | 4  | 21 |   | . | . | D'D  |
| mir-598    | 14 | 6 | 12 | 3  | 21 |   | . | . | CD'D |
| mir-648    | 2  | 5 | 12 | 4  | 21 |   |   | . | CD'  |
| let-7c     | 2  | 5 |    | 13 | 18 |   |   | . | D    |
| mir-29b-1  | 2  | 5 |    | 13 | 18 |   |   | . | -    |
| mir-220c   | 1  | 5 |    | 13 | 18 |   | . |   | D    |
| mir-545    | 1  | 5 |    | 13 | 18 |   |   | . | C    |
| mir-548b   | 1  | 5 |    | 13 | 18 |   |   | . | D    |
| mir-548n   | 1  | 6 |    | 12 | 18 |   | . |   | D    |
| mir-579    | 4  | 5 | -  | 13 | 18 |   | . | . | C    |
| mir-601    | 1  | 5 |    | 13 | 18 |   |   | . | D    |
| mir-644    | 2  | 5 |    | 13 | 18 |   |   | . | D    |
| mir-1250   | 1  | 5 |    | 13 | 18 |   |   | . | D    |

\*Hits represent different arrangements of snoRNA characteristics around a given miRNA. Hits are considered distinct if there is a difference of

positioning of at least one of boxes C, D or D' and/or a different position of the rRNA target sequence.

# Supplementary Fig. 1

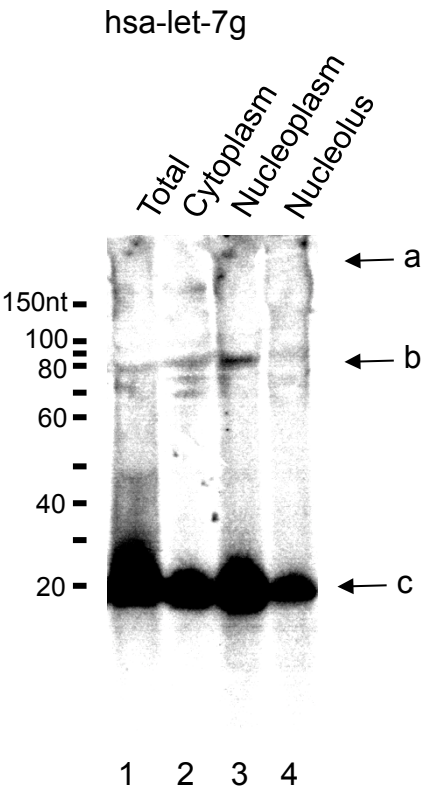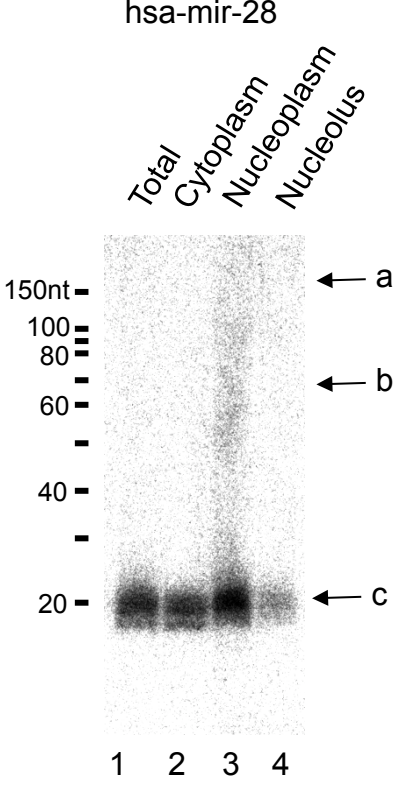

Supplement: supp_gkq1355_M_Ono_et_al_Supplement.pdf [file supp_gkq1355_M_Ono_et_al_Supplement.pdf]
